# Supplementary material for: RMBase v3.0: decode the landscape, mechanisms and functions of RNA modifications
Source: PubMed Central journal article supplement (PMC10767931; doi:10.1093/nar/gkad1070), 2023-11-13
Supplement: gkad1070_supplemental_file.pdf [file gkad1070_supplemental_file.pdf]

# Supplementary Material

## **Title:**

**RMBase v3.0: Decode the Landscape, Mechanisms and  
Functions of RNA Modifications**

## **Authors:**

Jiajia Xuan<sup>1,2,\*</sup>, Lifan Chen<sup>1</sup>, Zhirong Chen<sup>1</sup>, Junjie Pang<sup>1</sup>, Junhong Huang<sup>1</sup>, Jinran Lin<sup>1,3</sup>,  
Lingling Zheng<sup>1</sup>, Bin Li<sup>1,\*</sup>, Lianghu Qu<sup>1,\*</sup>, Jianhua Yang<sup>1,\*</sup>

## Figures

**Figure S1. Global map of the RNA modifications in humans.** (A) Heatmap of RNA modifications in different RNA species. The cell value represents the proportion of a particular RNA modification on an RNA to the total of that RNA modifications. Each row name represents one RNA modification type and its total number. Color bar shows the percentage. (B) Pie plot shows the abundance of clusters in five different RNA modifications. (C) Pie plot shows the distribution abundance of m<sup>6</sup>A modification clusters on different RNA.

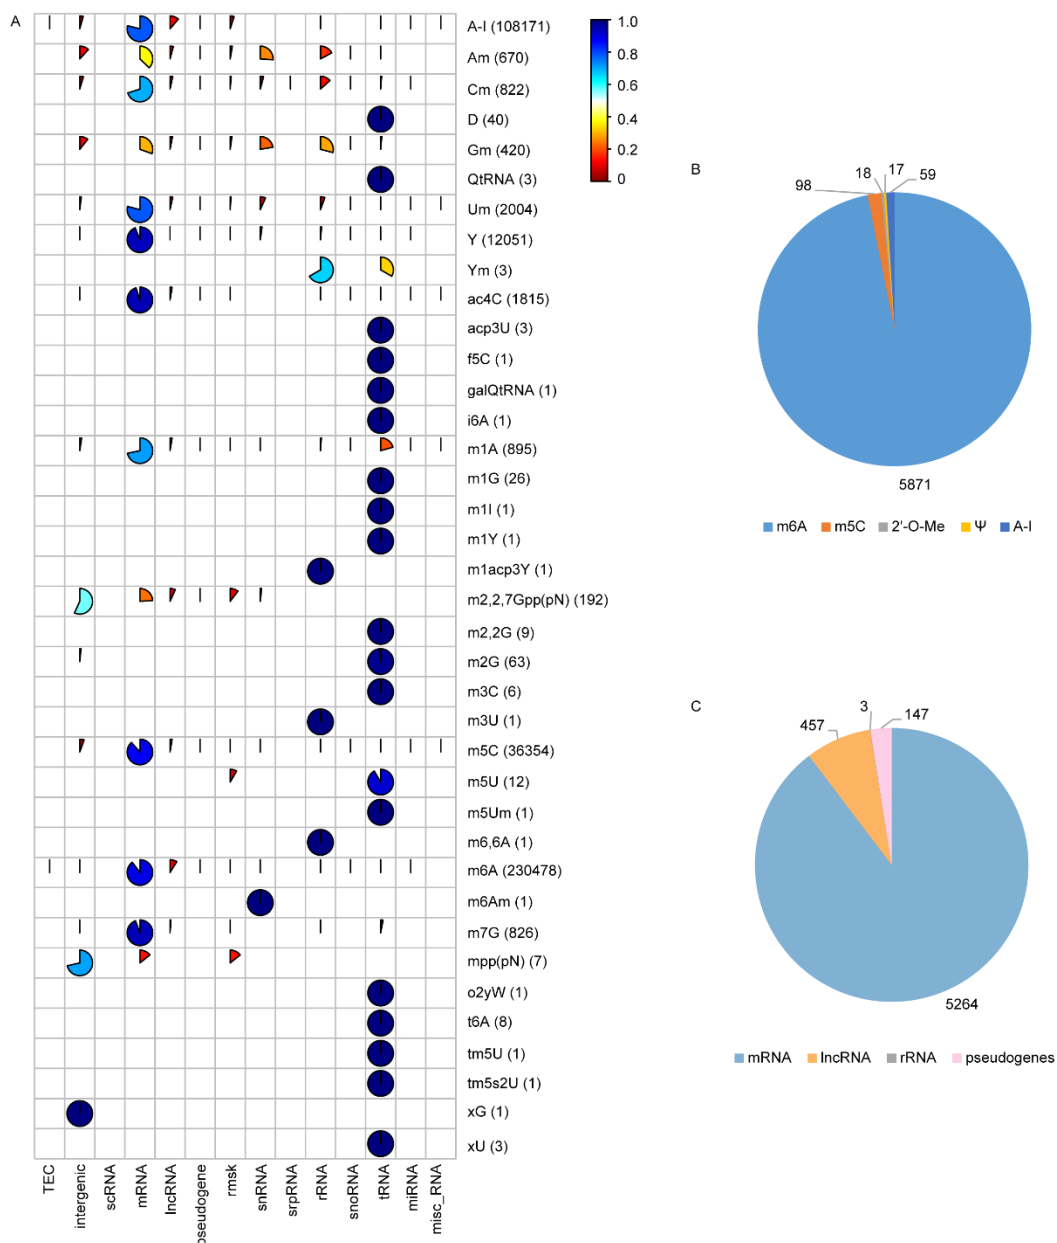

**Figure S2. The metagene plots of different RNA modifications.** These plots for m<sup>6</sup>A modification (A), A-I modification (B), Ψ modification (C) and m<sup>5</sup>C modification (D) in different species are generated using the "modMetagene" tool provided by RMBase v3.0.

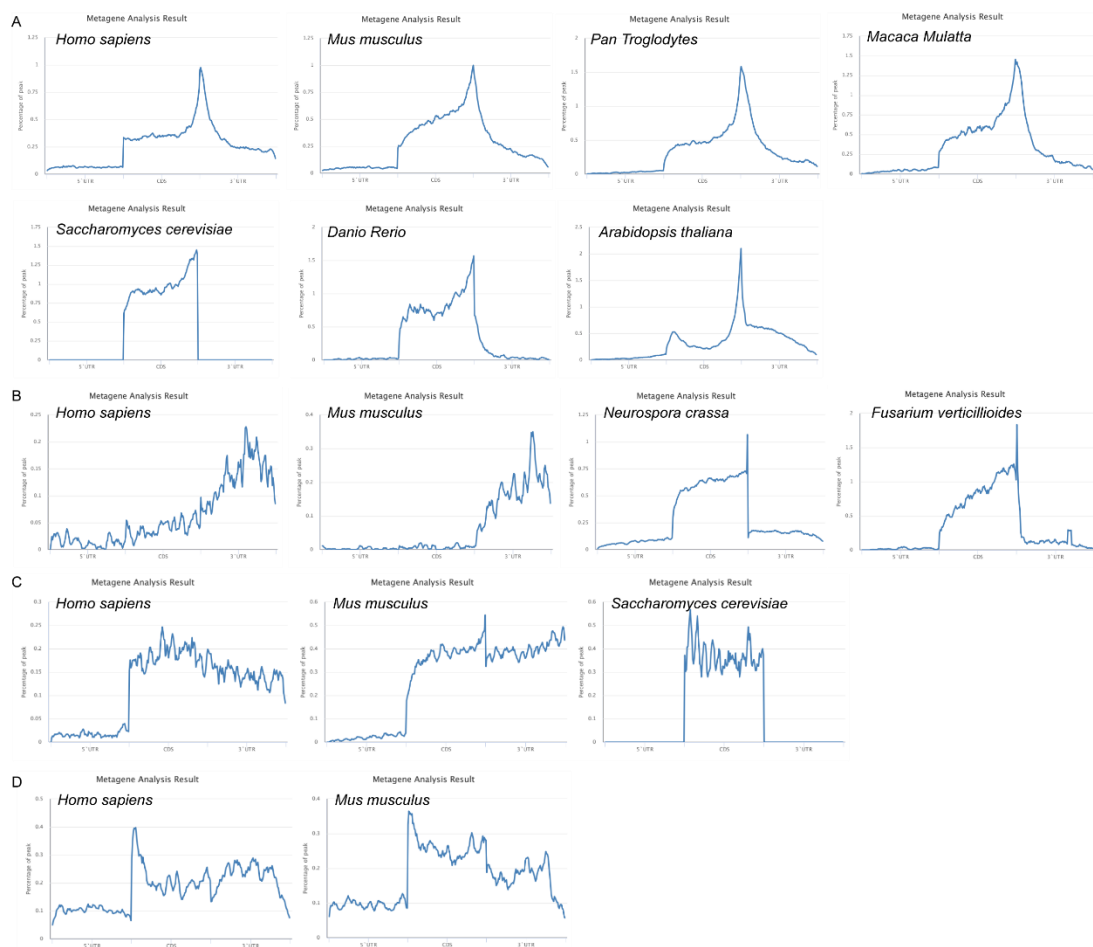

**Figure S3. Identification of 2'-O-Me modification sites guided by snoRNAs using sno2Nm.** (A) Flowchart of sno2Nm. (B) Pie plot shows that the distribution of known and novel snoRNA-guided 2'-O-Me sites on different gene biotypes.

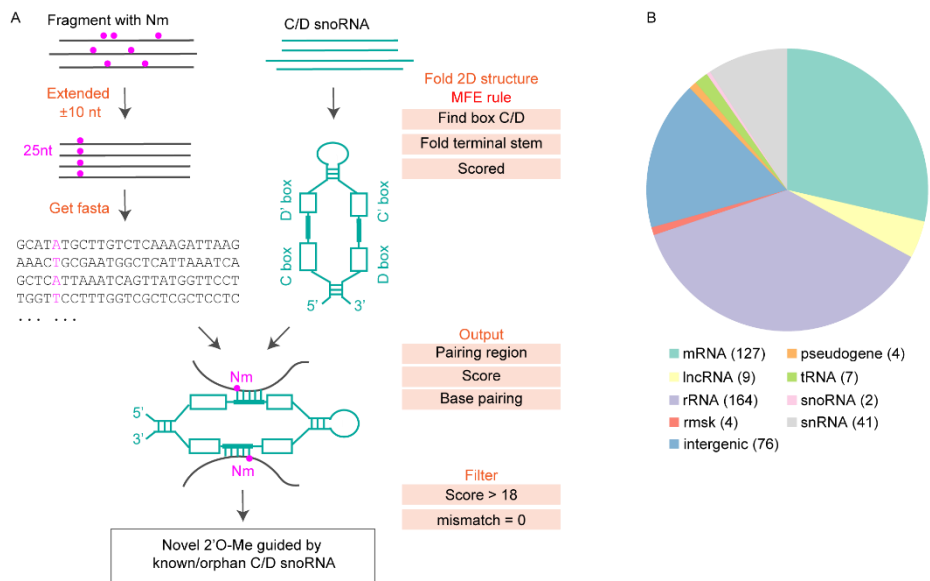

**Figure S4. Heatmap for differential expression of RMPs in 16 types of tumors.** "red" refers to up-regulated RMPs in tumors, while "blue" refers to down-regulated RMPs in tumors.

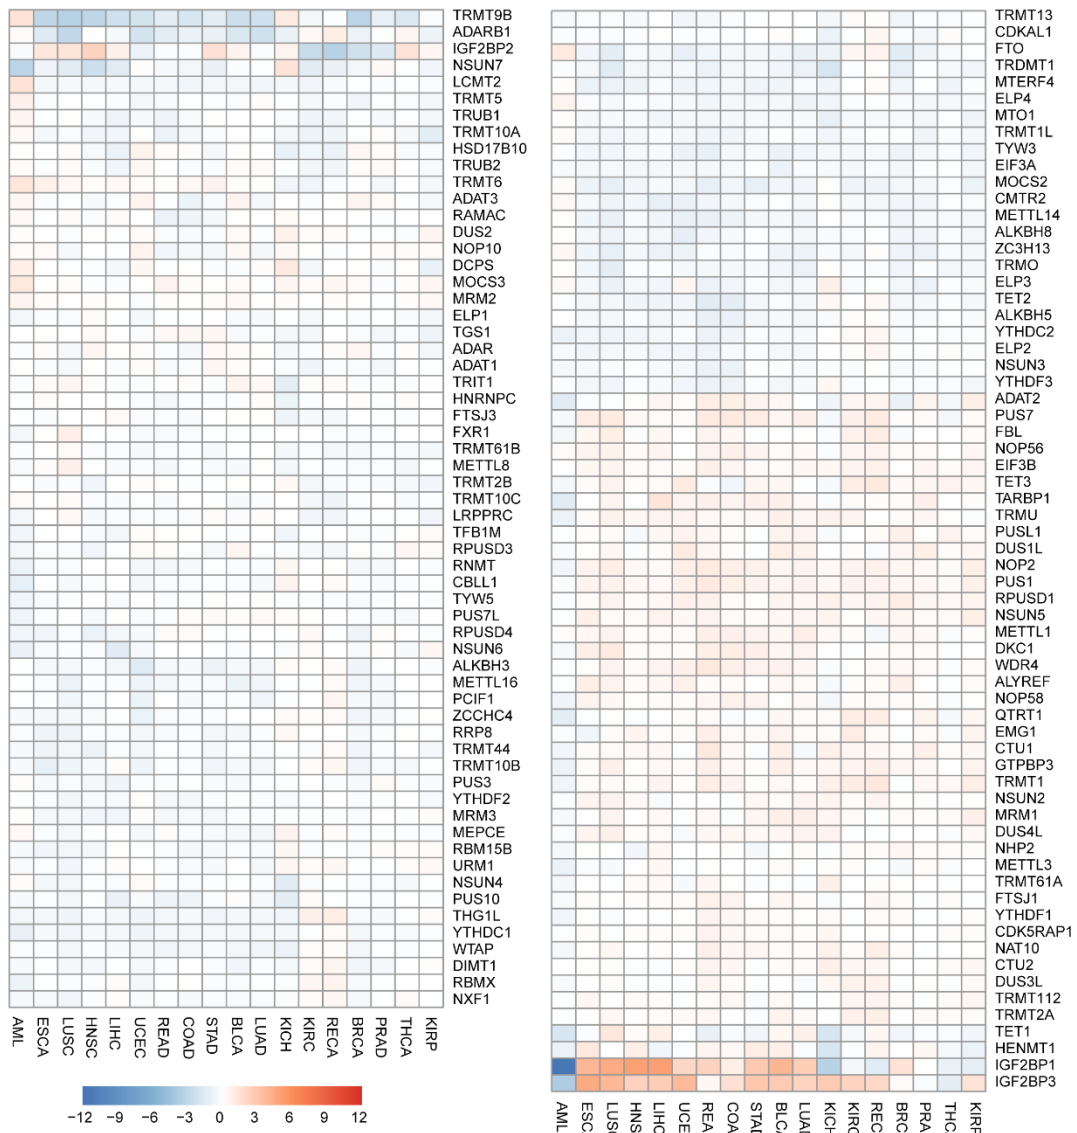

**Figure S5 The potential RNA structure motifs associated with specific RNA modifications.** The seqlogo plots show the RNA secondary structure features near the m<sup>1</sup>A modification site (A), Ψ modification site (B), m<sup>7</sup>G modification site (C) and m<sup>5</sup>C modification site (D) across different species. Where, "C" stands for "(", "G" stands for ")", and "T" stands for "." in the MFE secondary structure (dot-bracket). The modification site is at the sixteenth position.

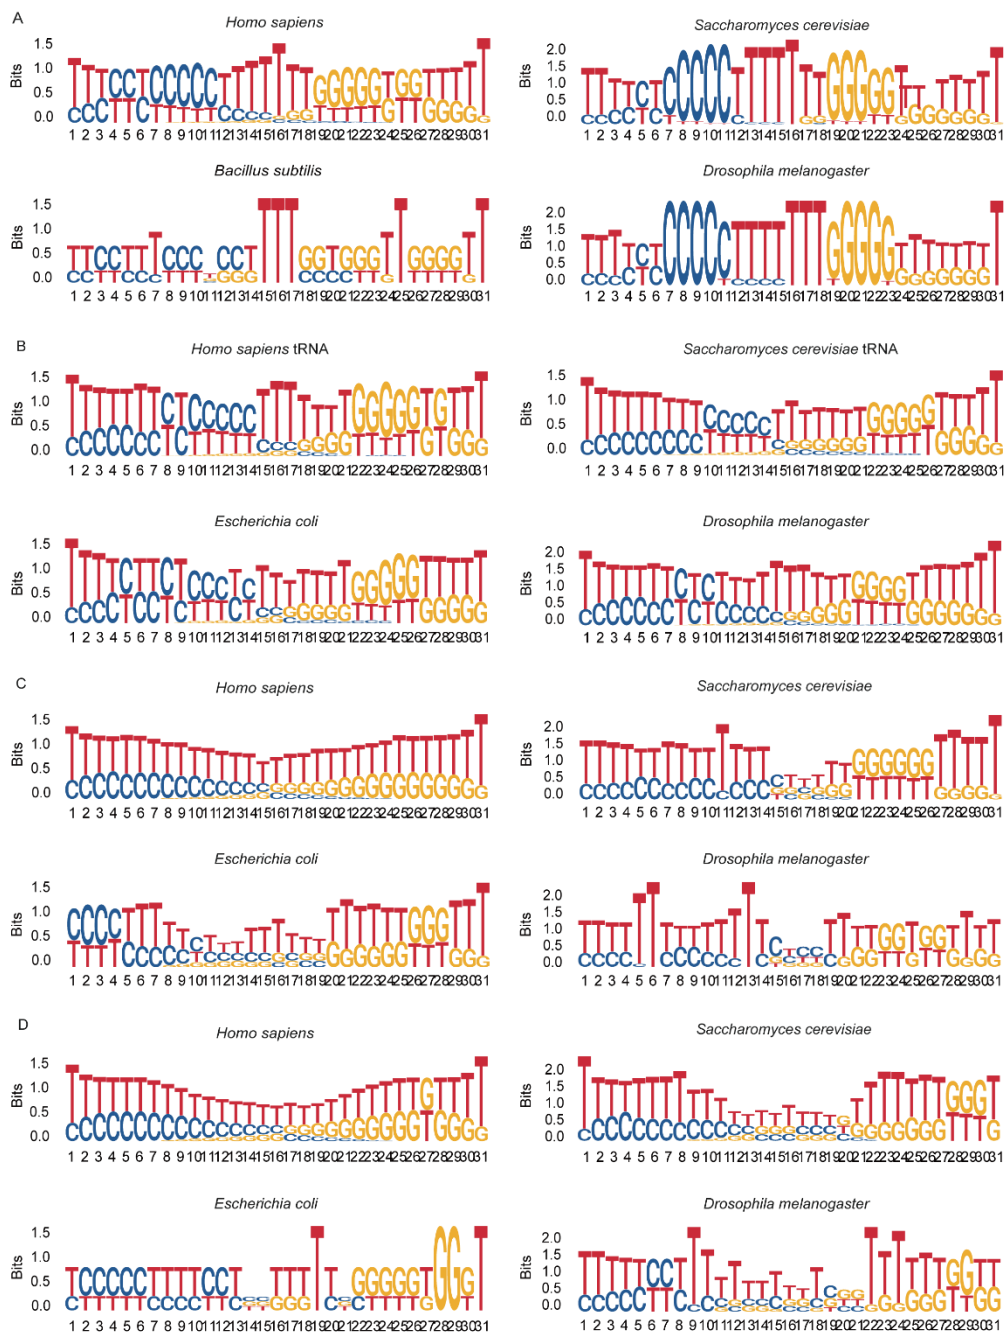

## Tables

**Table S1. Datasets source of RNA modifications and their intersecting factors.**

| <b>Data</b>                                        | <b>Datasets Source</b>                               | <b>Datasets List</b>                                                       |
|----------------------------------------------------|------------------------------------------------------|----------------------------------------------------------------------------|
| N <sup>1</sup> -methyladenosine (m <sup>1</sup> A) | GEO, PubMed                                          | m1A-seq, m1A-MAP                                                           |
| N <sup>5</sup> -methylcytosine (m <sup>5</sup> C)  | GEO, PubMed                                          | m5C-RIP, Bisulfite-seq                                                     |
| N <sup>6</sup> -methyladenosine (m <sup>6</sup> A) | GEO, PubMed                                          | miCLIP, m6A-CLIP/IP, MAZTER-seq, DART-seq, m6A-REF-seq, m6A-seq, MeRIP-seq |
| N <sup>7</sup> -Methylguanosine (m <sup>7</sup> G) | GEO, PubMed                                          | m7G-seq, BoRed-seq, m7G-RIP-seq                                            |
| Pseudouridine (Ψ)                                  | GEO, PubMed, snOPY, Yeast-snoRNADatabase, snoRNABase | Ψ-seq, CeU-seq, Pseudo-seq, PSI-seq, BID-seq, PRAISE                       |
| 2'-O-methylation (2'-O-Me)                         | GEO, PubMed, snOPY, Yeast-snoRNADatabase, snoRNABase | Nm-seq, RiboMeth-seq, RibOxi-seq, 2OMe-seq                                 |
| N <sup>4</sup> -acetylcytidine (ac <sup>4</sup> C) | GEO                                                  | ac4C-seq, acRIP-seq                                                        |
| RNA-editing (A-I)                                  | FairBase, REDIPortal, RADAR and DARNED               | /                                                                          |
| Other modifications                                | MODOMICS                                             | /                                                                          |
| RNA binding proteins (RBP)                         | starBase (1), ENCODE and POSTAR2 (2)                 | eCLIP, HITS-CLIP, iCLIP, PARCLIP                                           |
| miRNA targets                                      | starBase                                             | /                                                                          |
| single-nucleotide variations (SNV)                 | COSMIC (3) and published literatures (4,5)           | /                                                                          |
| single-nucleotide polymorphisms (SNP)              | Clinvar (6), GWAS (7) and GTEx (8)                   | /                                                                          |

**Table S2. Source of genomes and gene annotations of 62 species.**

| <b>Group</b> | <b>Species</b>                   | <b>Assembly</b>                | <b>Genome and Annotations</b>         |                                |
|--------------|----------------------------------|--------------------------------|---------------------------------------|--------------------------------|
| Mammal       | <i>Homo sapiens</i>              | hg38                           | gencode.v30, UCSC, miRBase v22        |                                |
|              | <i>Mus musculus</i>              | mm10                           | gencode.vM22, UCSC, miRBase v22       |                                |
|              | <i>Macaca mulatta</i>            | rheMac8                        | Ensembl v97, UCSC, miRBase v22        |                                |
|              | <i>Pan troglodytes</i>           | panTro5                        | Ensembl v97, UCSC, miRBase v22        |                                |
|              | <i>Rattus norvegicus</i>         | rn6                            | Ensembl v97, UCSC, miRBase v22        |                                |
|              | <i>Sus scrofa</i>                | susScr11                       | Ensembl v97, UCSC, miRBase v22        |                                |
|              | <i>Mesocricetus auratus</i>      | MesAur1.0                      | Ensembl v97                           |                                |
|              | <i>Oryctolagus cuniculus</i>     | OryCun2.0                      | Ensembl v97, UCSC, miRBase v22        |                                |
|              | <i>Ovis aries</i>                | Oar_v3                         | Ensembl v97, UCSC, miRBase v22        |                                |
|              | <i>Bos taurus</i>                | bosTau9                        | Ensembl v97, UCSC, miRBase v22        |                                |
| Plant        | <i>Arabidopsis thaliana</i>      | TAIR10                         | Ensembl v44, GtRNADB v18, miRBase v22 |                                |
|              | <i>Brassica napus</i>            | AST_PRJEB5043_v1               | Ensembl v44                           |                                |
|              | <i>Chlamydomonas reinhardtii</i> | CHLRE3                         | NCBI                                  |                                |
|              | <i>Cucumis sativus</i>           | ASM407v2                       | Ensembl v44                           |                                |
|              | <i>Glycine max</i>               | glyMax2.1                      | Ensembl v44, GtRNADB v18, miRBase v22 |                                |
|              | <i>Nicotiana tabacum</i>         | Ntab-TN90                      | NCBI                                  |                                |
|              | <i>Phaseolus vulgaris</i>        | PhaVulg1                       | Ensembl v44, miRBase v22              |                                |
|              | <i>Solanum tuberosum</i>         | SolTub3                        | Ensembl v44, miRBase v22              |                                |
|              | <i>Spinacia oleracea</i>         | ASM200726v1                    | NCBI                                  |                                |
|              | <i>Zea mays</i>                  | RefGenV4                       | Ensembl v44                           |                                |
|              | Metazoa                          | <i>Bombyx mori</i>             | ASM15162v1                            | Ensembl v44                    |
|              |                                  | <i>Caenorhabditis elegans</i>  | WBcel235                              | Ensembl v97, UCSC, miRBase v22 |
|              |                                  | <i>Xenopus laevis</i>          | Xenopus_laevis_v2                     | NCBI                           |
| Vertebrate   | <i>Danio rerio</i>               | danRer11                       | Ensembl v97, UCSC, miRBase v22        |                                |
|              | <i>Gallus gallus</i>             | GRCg6a                         | Ensembl v97, UCSC, miRBase v22        |                                |
| Fungi        | <i>Candida albicans</i>          | Cand_albi_12C                  | Ensembl v44                           |                                |
|              | <i>Fusarium graminearum</i>      | ASM24013v3                     | Ensembl v45, GtRNADB v18              |                                |
|              | <i>Fusarium verticillioides</i>  | ASM14955v1                     | Ensembl v45, GtRNADB v18              |                                |
|              | <i>Neurospora crassa</i>         | NC12                           | Ensembl v44                           |                                |
|              | <i>Pichia jadinii</i>            | Cybja1                         | NCBI                                  |                                |
|              | <i>Saccharomyces cerevisiae</i>  | sacCer3                        | Ensembl v97, GtRNADB v18              |                                |
|              | <i>Schizosaccharomyces pombe</i> | ASM294v2                       | Ensembl v44, GtRNADB v18              |                                |
|              | Insect                           | <i>Drosophila melanogaster</i> | BDGP6                                 | Ensembl v97, UCSC, miRBase v22 |
| Protists     |                                  | <i>Tetrahymena thermophila</i> | JCVI-TTA1-2.2                         | Ensembl v44                    |
|              | Bacteria                         | <i>Bacillus subtilis</i>       | ASM69118v1                            | Ensembl v44                    |



---

|       |                                          |                |                          |
|-------|------------------------------------------|----------------|--------------------------|
|       | <i>Clostridium acetobutylicum</i>        | ASM78585v1     | Ensembl v44              |
|       | <i>Escherichia coli</i>                  | ASM584v2       | Ensembl v44, GtRNAdb v18 |
|       | <i>Geobacillus stearothermophilus</i>    | ASM74998v1     | Ensembl v44              |
|       | <i>Halobacterium salinarum</i>           | ASM680v1       | Ensembl v44, GtRNAdb v18 |
|       | <i>Halococcus morrhuae</i>               | ASM33669v1     | Ensembl v44              |
|       | <i>Haloferax volcanii</i>                | ASM2568v1      | Ensembl v44, GtRNAdb v18 |
|       | <i>Lactococcus lactis</i>                | ASM76111v1     | Ensembl v44, GtRNAdb v18 |
|       | <i>Mycobacterium smegmatis</i>           | ASM76770v1     | Ensembl v44, GtRNAdb v18 |
|       | <i>Mycoplasma capricolum</i>             | ASM83033v1     | Ensembl v44, GtRNAdb v18 |
|       | <i>Mycoplasma mycoides</i>               | ASM25307v1     | Ensembl v44, GtRNAdb v18 |
|       | <i>Pseudomonas aeruginosa</i>            | ASM676v1       | Ensembl v44, GtRNAdb v18 |
|       | <i>Pyrococcus abyssi</i>                 | ASM19593v2     | Ensembl v45              |
|       | <i>Rhodospirillum rubrum</i>             | ASM1308v1      | Ensembl v44              |
|       | <i>Salmonella typhimurium</i>            | ASM553737v1    | NCBI                     |
|       | <i>Spiroplasma citri</i>                 | ASM188685v1    | NCBI                     |
|       | <i>Streptomyces coelicolor</i><br>A3 (2) | ASM20383v1     | Ensembl v44              |
|       | <i>Streptomyces griseus</i>              | ASM93222v1     | Ensembl v44              |
|       | <i>Sulfolobus acidocaldarius</i>         | ASM1228v1      | Ensembl v44, GtRNAdb v18 |
|       | <i>Sulfolobus solfataricus</i>           | ASM96839v1     | Ensembl v44              |
|       | <i>Synechococcus elongatus PCC 6301</i>  | ASM1006v1      | NCBI, GtRNAdb v18        |
|       | <i>Synechococcus sp.PCC 7002</i>         | ASM1948v1      | NCBI, GtRNAdb v18        |
|       | <i>Synechocystis sp</i>                  | ASM34078v1     | NCBI                     |
|       | <i>Thermoplasma acidophilum</i>          | ASM19591v1     | Ensembl v44, GtRNAdb v18 |
|       | <i>Thermotoga maritima</i>               | ASM97857v1     | Ensembl v44, GtRNAdb v18 |
|       | <i>Thermus thermophilus</i>              | ASM812v1       | Ensembl v44, GtRNAdb v18 |
| Virus | <i>Enterobacteria phage T4</i>           | ViralProj14044 | NCBI                     |
|       | <i>Enterobacteria phage T5</i>           | ASM292140v1    | NCBI                     |

---

**Table S3. Overview of the top five clusters with the most abundant RNA modification sites of m<sup>6</sup>A, m<sup>5</sup>C, 2'-O-Me, Ψ, and A-I.** “Number” is the number of RNA modification sites in the cluster. “Density” refers to the average distance between RNA modification sites within a cluster.

| Gene Name    | Gene Type  | Cluster                     | Number | Density | Modification |
|--------------|------------|-----------------------------|--------|---------|--------------|
| MKI67        | mRNA       | chr10:128105818-128109436:- | 113    | 32.0177 | m6A          |
| MKI67        | mRNA       | chr10:128103187-128105817:- | 83     | 31.6867 | m6A          |
| PLIN4        | mRNA       | chr19:4510671-4513028:-     | 75     | 31.4267 | m6A          |
| AL121827.2   | lncRNA     | chr20:63256960-63258120:+   | 74     | 15.6757 | m6A          |
| CREB3L3      | mRNA       | chr19:4171681-4172987:+     | 71     | 18.3944 | m6A          |
| CENPB        | mRNA       | chr20:3786441-3786639:-     | 29     | 6.82759 | m5C          |
| ANKRD9       | mRNA       | chr14:102509599-102509799:- | 25     | 8       | m5C          |
| ZSWIM6       | mRNA       | chr5:61332733-61332870:+    | 24     | 5.70833 | m5C          |
| BTBD2        | mRNA       | chr19:2015393-2015714:-     | 21     | 15.2857 | m5C          |
| TBL1X        | mRNA       | chrX:9465148-9465351:+      | 20     | 10.15   | m5C          |
| FP236383.1   | lncRNA     | chr21:8400486-8401014:+     | 23     | 22.9565 | 2'-O-Me      |
| FP236383.1   | lncRNA     | chr21:8444718-8445246:+     | 23     | 22.9565 | 2'-O-Me      |
| FP671120.2   | lncRNA     | chr21:8217522-8217976:+     | 21     | 21.619  | 2'-O-Me      |
| FP236383.1   | lncRNA     | chr21:8401055-8401597:+     | 19     | 28.5263 | 2'-O-Me      |
| FP236383.1   | lncRNA     | chr21:8445287-8445829:+     | 19     | 28.5263 | 2'-O-Me      |
| FP671120.2   | lncRNA     | chr21:8218114-8218611:+     | 20     | 24.85   | Ψ            |
| FP236383.1   | lncRNA     | chr21:8401152-8401649:+     | 20     | 24.85   | Ψ            |
| FP236383.1   | lncRNA     | chr21:8445384-8445881:+     | 20     | 24.85   | Ψ            |
| FP671120.2   | lncRNA     | chr21:8210380-8211125:+     | 17     | 43.8235 | Ψ            |
| FP236383.1   | lncRNA     | chr21:8393415-8394160:+     | 17     | 43.8235 | Ψ            |
| BMS1P10      | pseudogene | chr9:63302059-63302732:-    | 59     | 11.4068 | A-I          |
| OSMR-AS1     | lncRNA     | chr5:38820960-38821768:-    | 41     | 19.7073 | A-I          |
| ISPD         | mRNA       | chr7:16089130-16089520:-    | 38     | 10.2632 | A-I          |
| TNFRSF14-AS1 | lncRNA     | chr1:2556076-2556686:-      | 32     | 19.0625 | A-I          |
| OSMR-AS1     | lncRNA     | chr5:38822949-38823463:-    | 31     | 16.5806 | A-I          |

**Table S4. The  $\Psi$  targets of H/ACA snoRNAs** (top 15 for guide H/ACA snoRNA and orphan H/ACA snoRNA respectively). “a” refers to known guide H/ACA snoRNA, “b” refers to orphan H/ACA snoRNA.

| snoRNA                  | Modification Site | Score  | Target Type | Gene Type | Gene         | Target Sequence        |
|-------------------------|-------------------|--------|-------------|-----------|--------------|------------------------|
| SNORA16A <sup>a</sup>   | 28S:4412          | 27.332 | known       | rRNA      | LSU-rRNA_Hsa | CGCUUUUUGAYCCUUCGAUGU  |
| SNORA31 <sup>a</sup>    | 28S:3713          | 26.462 | known       | rRNA      | LSU-rRNA_Hsa | AGAAAUUCAAYGAAGCGCGGG  |
| SNORA17A <sup>a</sup>   | 28S:4659          | 25.871 | known       | rRNA      | LSU-rRNA_Hsa | GGAUUAUGACYGAACGCCUCU  |
| SNORA27 <sup>a</sup>    | 28S:3694          | 25.392 | known       | rRNA      | LSU-rRNA_Hsa | GCUCUGAAUGYCAAAGUGAAG  |
| SCARNA3 <sup>a</sup>    | U6:40             | 24.733 | known       | snRNA     | U6           | AUUGGAACGAYACAGAGAAGA  |
| SNORA8 <sup>a</sup>     | 18S:1081          | 24.046 | known       | rRNA      | SSU-rRNA_Hsa | GUUCCGACCAYAAACGAUGCC  |
| SNORA17A <sup>a</sup>   | psi_2154          | 23.326 | unknow      | rRNA      | LSU-rRNA_Hsa | GGAUUAUGACYGAACGCCUUU  |
| SNORA68B <sup>a</sup>   | psi_2197          | 23.157 | unknow      | lncRNA    | MAGI2-AS3    | UUCUGUUUAAAYAUCUUCAAGU |
| SNORA68 <sup>a</sup>    | psi_2197          | 23.157 | unknow      | lncRNA    | MAGI2-AS3    | UUCUGUUUAAAYAUCUUCAAGU |
| SNORA2A <sup>a</sup>    | psi_2258          | 22.992 | unknow      | mRNA      | C9orf85      | UAGAUUUUGAYAUUGAUUUAG  |
| SNORA10B <sup>a</sup>   | psi_151           | 22.718 | unknow      | mRNA      | C11orf1      | ACCUGAGGAAYAUCGUGCAGC  |
| SNORA10 <sup>a</sup>    | psi_151           | 22.718 | unknow      | mRNA      | C11orf1      | ACCUGAGGAAYAUCGUGCAGC  |
| SNORA30 <sup>a</sup>    | 28S:4643          | 22.557 | known       | rRNA      | LSU-rRNA_Hsa | GAAGCUACCAYCUGUGGGAUU  |
| SNORA3B <sup>a</sup>    | 28S:3899          | 22.557 | known       | rRNA      | LSU-rRNA_Hsa | CCUGUUGAGCYUGACUCUAGU  |
| SNORA30B <sup>a</sup>   | 28S:4643          | 22.557 | known       | rRNA      | LSU-rRNA_Hsa | GAAGCUACCAYCUGUGGGAUU  |
| SNORA2_3 <sup>b</sup>   | psi_2258          | 22.992 | unknow      | mRNA      | C9orf85      | UAGAUUUUGAYAUUGAUUUAG  |
| SNORA38B <sup>b</sup>   | 28S:4269          | 22.869 | known       | rRNA      | LSU-rRNA_Hsa | UUGAUCUUGAYUUUCAGUACG  |
| SNORA101B <sup>b</sup>  | psi_1561          | 21.335 | unknow      | snRNA     | U2           | CUUCUCGGCCYUUUGGCUAAG  |
| SNORA58B <sup>b</sup>   | psi_2313          | 21.008 | unknow      | mRNA      | LAP3         | UGAAGUUCCCYAUCUACGGAA  |
| SNORA15B-1 <sup>b</sup> | psi_2031          | 20.947 | unknow      | mRNA      | ZNF75D       | AGCUGUCUGUYUUAUUCAGCA  |
| SNORA15B-2 <sup>b</sup> | psi_2031          | 20.947 | unknow      | mRNA      | ZNF75D       | AGCUGUCUGUYUUAUUCAGCA  |
| SNODB2082 <sup>b</sup>  | psi_319           | 20.936 | unknow      | mRNA      | PHGDH        | CAGAGUGGAGYCUCCUCACAG  |
| SNORA7 <sup>b</sup>     | 28S:1779          | 20.368 | known       | rRNA      | LSU-rRNA_Hsa | UCUCAACCUYAAAUGGGUAA   |

---

|                       |          |        |        |      |              |                       |
|-----------------------|----------|--------|--------|------|--------------|-----------------------|
| SNORA58B <sup>b</sup> | 28S:3823 | 20.342 | known  | rRNA | LSU-rRNA_Hsa | CCACUGUCCCYACCUACUAUC |
| SNORA5 <sup>b</sup>   | 18S:1625 | 19.842 | known  | rRNA | SSU-rRNA_Hsa | UUGCAAUUAUYCCCCAUGAAC |
| SNORA5 <sup>b</sup>   | psi_648  | 19.842 | unknow | rRNA | SSU-rRNA_Hsa | UUGCAAUUAUYCCCCAUGAAG |
| SNORA5 <sup>b</sup>   | psi_1951 | 19.842 | unknow | rRNA | SSU-rRNA_Hsa | UUGCAAUUAUYCCCCAUGACC |
| SNORA38 <sup>b</sup>  | psi_147  | 19.813 | unknow | mRNA | MRPS21       | UCCAUCUCUUYUCUUUGUACA |
| SNORA38 <sup>b</sup>  | psi_1486 | 19.813 | unknow | mRNA | PEX1         | CUGCAUUCUUYUCUUUGAUGA |
| SNORA38 <sup>b</sup>  | psi_1609 | 19.813 | unknow | mRNA | PPP4R1       | GACAGCUCUUYACUUUGUACU |

---

**Table S5. The 2'-O-Me targets of C/D snoRNAs (top 20).**

| snoRNA   | Gene Type  | Gene         | Target Sequence            | Score  |
|----------|------------|--------------|----------------------------|--------|
| SNORD57  | intergenic | intergenic   | GCTCATTAAATCAGTTTTTTTTGCCT | 45.236 |
| SNORD20  | rRNA       | SSU-rRNA_Hsa | AACTTGACTATCTAGAGGAA       | 36.508 |
| SNORD14E | rRNA       | SSU-rRNA_Hsa | ACATCCAAGGAAGGTAG          | 31.878 |
| SNORD59B | intergenic | intergenic   | AAGAACGAAAGTCAGAA          | 31.145 |
| SNORD91B | rRNA       | LSU-rRNA_Hsa | ACAGG TTCAGACATTT          | 29.355 |
| SNORD91B | rRNA       | LSU-rRNA_Hsa | ACAGG TTCAGACATTT          | 29.355 |
| SNORD57  | rRNA       | SSU-rRNA_Hsa | GCTCATTAAATCAGTT           | 28.968 |
| SNORD37  | intergenic | intergenic   | GTCAAAGTGAAGAAAT           | 28.912 |
| SNORD14A | intergenic | intergenic   | ACATCCAAGGAAGGACT          | 28.456 |
| SNORD14A | mRNA       | KCTD10       | TCATCCAAGGAAGAAC           | 28.274 |
| SNORD14B | rRNA       | SSU-rRNA_Hsa | ACATCCAAGGAAGGT            | 28.131 |
| SNORD14C | rRNA       | SSU-rRNA_Hsa | ACATCCAAGGAAGGT            | 28.131 |
| SNORD91B | rRNA       | LSU-rRNA_Hsa | GCAGG TTCAGACATTT          | 27.652 |
| SNORD91B | rRNA       | LSU-rRNA_Hsa | CCAGG TTCAGACATTT          | 27.652 |
| SNORD67  | snRNA      | U6           | ATGGCCCTGTGCA              | 27.258 |
| SNORD37  | mRNA       | CNTNAP5      | GTCAAAGTGAAGAAA            | 27.255 |
| SNORD37  | pseudogene | AC109583.1   | GTCAAAGTGAAGAAA            | 27.255 |
| SNORD45A | mRNA       | CAMK2D       | TGTAATTCTAGAGCTA           | 27.214 |
| SNORD45C | mRNA       | CAMK2D       | TGTAATTCTAGAGCTA           | 27.214 |
| SNORD105 | rRNA       | SSU-rRNA_Hsa | AGCGTTTACTTTGAA            | 27.168 |

**Table S6. Overview of SCNA regions**, consist of 36 amplification regions (Any-AP\*) and 142 deletion regions (Any-DP\*), that are identified from 146 RMPs in 16 types of tumors.

| SCNA ID  | Genome Coordinate         | SCNA ID  | Genome Coordinate       | SCNA ID  | Genome Coordinate        |
|----------|---------------------------|----------|-------------------------|----------|--------------------------|
| Any-DP22 | chr10:18039971-38011171   | Any-DP30 | chr15:23687036-47187107 | Any-DP4  | chr2:234076904-242193529 |
| Any-AP10 | chr10:67553187-83045635   | Any-DP34 | chr15:33847092-43414476 | Any-DP1  | chr2:238550823-242193529 |
| Any-DP16 | chr10:84516936-133797422  | Any-DP31 | chr15:35232510-57223137 | Any-DP4  | chr2:238552211-242193529 |
| Any-DP25 | chr10:84517918-133797422  | Any-DP33 | chr15:37092607-43751053 | Any-DP4  | chr2:240605436-242193529 |
| Any-DP23 | chr10:99227306-133797422  | Any-DP35 | chr15:37099383-65387736 | Any-DP31 | chr22:43808440-50818468  |
| Any-DP25 | chr11:103083226-133786067 | Any-DP3  | chr1:54882224-146716040 | Any-DP45 | chr22:45147014-50818468  |
| Any-DP28 | chr11:104248923-135086622 | Any-DP3  | chr1:60968430-146716040 | Any-DP43 | chr22:45598443-50818468  |
| Any-DP17 | chr11:106051237-135086622 | Any-DP11 | chr16:1073224-90338345  | Any-DP40 | chr22:45842244-50818468  |
| Any-DP29 | chr11:107017966-122090888 | Any-DP34 | chr16:1-1772130         | Any-AP4  | chr2:27050024-31902797   |
| Any-DP2  | chr1:1-22273002           | Any-DP37 | chr16:1-860688          | Any-DP4  | chr2:29462731-119170220  |
| Any-DP2  | chr1:1-27537744           | Any-DP40 | chr16:31758063-70219917 | Any-DP5  | chr2:32038092-47339841   |
| Any-DP2  | chr1:1-27540195           | Any-AP27 | chr16:67051986-77286707 | Any-DP6  | chr2:40508595-45657277   |
| Any-DP3  | chr1:1-31503462           | Any-DP17 | chr16:74413389-90338345 | Any-AP3  | chr2:60217741-61040694   |
| Any-DP2  | chr1:1-32184201           | Any-DP18 | chr16:75653775-90338345 | Any-AP6  | chr3:162740552-198295559 |
| Any-AP17 | chr11:33521255-35407436   | Any-DP34 | chr16:85305209-90338345 | Any-AP1  | chr3:175206052-198295559 |
| Any-AP21 | chr11:34140379-35099383   | Any-DP35 | chr17:1-1921251         | Any-DP6  | chr3:183399451-198295559 |
| Any-DP1  | chr1:1-34868247           | Any-DP44 | chr17:1-4276191         | Any-DP5  | chr3:1-99843146          |
| Any-DP18 | chr11:37945516-49038091   | Any-DP12 | chr17:1-9804657         | Any-DP5  | chr3:42221061-64095595   |
| Any-AP1  | chr1:153772474-155317730  | Any-DP28 | chr17:40859914-83257441 | Any-DP5  | chr3:45787059-62264083   |
| Any-DP3  | chr1:1-5865449            | Any-AP10 | chr17:53482168-83257441 | Any-DP8  | chr4:1-12228847          |
| Any-DP2  | chr1:16449987-32474850    | Any-AP30 | chr17:58972171-82613252 | Any-DP8  | chr4:113024717-133099621 |
| Any-DP1  | chr1:1-8210429            | Any-AP22 | chr17:70437748-83257441 | Any-DP8  | chr4:68339322-99412774   |
| Any-DP13 | chr11:85844359-135086622  | Any-DP36 | chr17:80961398-83257441 | Any-DP10 | chr4:94736854-112153735  |

|          |                           |          |                          |          |                          |
|----------|---------------------------|----------|--------------------------|----------|--------------------------|
| Any-DP14 | chr11:96375540-135086622  | Any-DP3  | chr1:78854116-146716040  | Any-DP9  | chr5:103557581-114366226 |
| Any-DP25 | chr12:118416942-133275309 | Any-DP19 | chr18:1-80373285         | Any-DP14 | chr5:109877935-115172890 |
| Any-DP29 | chr12:121417330-133275309 | Any-DP36 | chr18:36065361-74410170  | Any-DP4  | chr5:1208683-136317879   |
| Any-DP20 | chr12:123244069-133275309 | Any-DP2  | chr1:84139647-115055946  | Any-AP6  | chr5:121373929-181538259 |
| Any-DP19 | chr12:23188659-133275309  | Any-DP3  | chr1:89934392-102877252  | Any-AP5  | chr5:151548708-181538259 |
| Any-DP1  | chr1:224734013-237051607  | Any-DP36 | chr19:1100076-1943799    | Any-DP11 | chr5:155014906-181538259 |
| Any-AP5  | chr1:234376848-235100677  | Any-DP29 | chr19:1-11096366         | Any-DP9  | chr5:31177078-181538259  |
| Any-AP17 | chr12:57692920-57857873   | Any-DP41 | chr19:1-1912474          | Any-DP10 | chr5:75487100-143813640  |
| Any-AP15 | chr12:57739474-57976149   | Any-DP20 | chr19:1271276-4232571    | Any-DP14 | chr5:78789805-135040865  |
| Any-DP30 | chr12:69954235-133275309  | Any-DP41 | chr19:1293079-2233892    | Any-DP18 | chr6:1-24429461          |
| Any-DP29 | chr12:72026299-133275309  | Any-DP41 | chr19:1-3366418          | Any-DP10 | chr6:128023474-170805979 |
| Any-DP25 | chr12:75427945-133275309  | Any-DP13 | chr19:1-57774763         | Any-DP13 | chr6:1-30499917          |
| Any-DP27 | chr12:98544935-133275309  | Any-DP21 | chr19:1-58617616         | Any-DP14 | chr6:149072252-170805979 |
| Any-AP15 | chr13:1-47260471          | Any-AP43 | chr19:16565517-18004678  | Any-DP12 | chr6:57309540-117487381  |
| Any-DP10 | chr13:22885862-86954491   | Any-DP33 | chr19:1-7401250          | Any-DP17 | chr6:57347010-132302870  |
| Any-DP21 | chr13:44548519-48305524   | Any-DP42 | chr19:19351525-58617616  | Any-DP13 | chr6:73828037-121080765  |
| Any-AP2  | chr1:38858493-43645853    | Any-DP39 | chr19:45484771-58617616  | Any-DP12 | chr6:79311053-98836429   |
| Any-AP2  | chr1:39574036-40078732    | Any-DP1  | chr1:98271211-119712502  | Any-DP14 | chr7:1-3302828           |
| Any-AP1  | chr1:39789450-40133402    | Any-DP34 | chr20:1-64444167         | Any-AP7  | chr7:21559416-37277484   |
| Any-DP21 | chr14:102722147-107043718 | Any-AP46 | chr20:2586165-4402978    | Any-AP8  | chr7:70337996-103926122  |
| Any-DP29 | chr14:103186698-107043718 | Any-AP21 | chr20:43613202-50341857  | Any-DP13 | chr8:11771885-51321318   |
| Any-DP19 | chr14:1-107043718         | Any-DP37 | chr21:18220890-46709983  | Any-AP13 | chr8:122611767-128894558 |
| Any-DP33 | chr14:1-28729025          | Any-DP7  | chr2:121285113-181676580 | Any-DP16 | chr8:15237757-29922546   |
| Any-DP20 | chr14:1-34433896          | Any-DP2  | chr2:1-242193529         | Any-DP15 | chr8:21895475-31643737   |
| Any-DP15 | chr14:1-34716226          | Any-DP44 | chr21:37267476-46709983  | Any-DP17 | chr8:22257058-28321147   |
| Any-DP30 | chr14:1-46069185          | Any-DP41 | chr21:39347707-43612563  | Any-DP6  | chr8:55763213-133244567  |

|          |                          |          |                          |          |                          |
|----------|--------------------------|----------|--------------------------|----------|--------------------------|
| Any-DP30 | chr14:1-49579565         | Any-DP5  | chr2:208822783-242193529 | Any-AP11 | chr8:64714595-113387382  |
| Any-DP1  | chr1:4418360-31368947    | Any-DP44 | chr22:1-21741481         | Any-AP12 | chr9:124783428-129198374 |
| Any-DP21 | chr14:57863913-107043718 | Any-DP4  | chr2:212536940-242193529 | Any-DP21 | chr9:38617174-111900370  |
| Any-DP29 | chr14:58274934-107043718 | Any-DP1  | chr2:213742524-242193529 | Any-DP15 | chrX:1-156040895         |
| Any-DP29 | chr14:81617875-107043718 | Any-DP14 | chr22:1-50818468         | Any-AP24 | chrX:133367616-156040895 |
| Any-DP34 | chr14:81618928-107043718 | Any-DP4  | chr2:217939472-242193529 | Any-AP30 | chrX:133560672-156040895 |
| Any-DP33 | chr14:92740008-107043718 | Any-AP36 | chr22:18124604-26431626  | Any-AP28 | chrX:152108541-156040895 |
| Any-DP32 | chr15:1-40693915         | Any-AP30 | chr22:18131163-21785126  | Any-AP28 | chrX:152576712-155653639 |
| Any-DP16 | chr15:1-56262145         | Any-DP2  | chr2:224394640-242193529 | Any-AP50 | chrX:153530695-155653639 |
| Any-DP23 | chr15:1-61854397         | Any-DP3  | chr2:227147251-242193529 |          |                          |
| Any-DP35 | chr15:1-82096090         | Any-DP5  | chr2:228174428-242193529 |          |                          |



**Table S7. Improvements of RMBase v3.0 against previous versions.**

This table describes the major improvements of data features and web-based functionalities in updated RMBase v3.0 by comparing to previous version. (<sup>a</sup> is Curated Data, <sup>b</sup> is Main Results, <sup>c</sup> is Web-based Functionalities)

| <b>Items</b>                                          | <b>RMBase v3.0</b>                            | <b>previous version</b>                  |
|-------------------------------------------------------|-----------------------------------------------|------------------------------------------|
| Species <sup>a</sup>                                  | 62 species (9 clades)                         | 13 species (6 clades)                    |
| Types of RNA Modifications <sup>a</sup>               | 73                                            | 47                                       |
| Datasets of RNA Modifications <sup>a</sup>            | 1,886 datasets (834 WT datasets), 6 databases | 604 datasets, 3 databases                |
| Datasets of m <sup>6</sup> A <sup>a</sup>             | 689 datasets, modomics                        | 507 datasets, modomics                   |
| Datasets of m <sup>1</sup> A <sup>a</sup>             | 72 datasets, modomics                         | 72 datasets, modomics                    |
| Datasets of m <sup>5</sup> C <sup>a</sup>             | 38 datasets, modomics                         | 4 datasets, modomics                     |
| Datasets of pseudo <sup>a</sup>                       | 19 datasets, modomics, snoRNABase, snOPY      | 16 datasets, modomics, snoRNABase, snOPY |
| Datasets of 2'-O-Me <sup>a</sup>                      | 6 datasets, modomics, snoRNABase, snOPY       | 5 datasets, modomics                     |
| Datasets of m <sup>7</sup> G <sup>a</sup>             | 6 datasets, modomics                          | modomics                                 |
| Datasets of ac <sup>4</sup> C <sup>a</sup>            | 4 datasets, modomics                          | modomics                                 |
| Datasets of RNA-editing <sup>a</sup>                  | modomics, REDiportal, DARNED, RADAR, FairBase | modomics                                 |
| RBP Datasets <sup>a</sup>                             | 1,439 (6 species)                             | (2 species)                              |
| RBP Biding Sites (Raw Data) <sup>a</sup>              | 108,320,121                                   | 67,598,301                               |
| SNV Sites <sup>a</sup>                                | 19,437,720                                    | 19,087,089                               |
| SNP Sites <sup>a</sup>                                | 46,735,114                                    | 2,052,046                                |
| Types of miRNA Targets <sup>a</sup>                   | 5                                             | 1                                        |
| miRNA Targets (circRNA) <sup>a</sup>                  | 1,229,615                                     | 0                                        |
| miRNA Targets (lincRNA) <sup>a</sup>                  | 83,759                                        | 0                                        |
| miRNA Targets (mRNA) <sup>a</sup>                     | 3,170,237                                     | 426,683                                  |
| miRNA Targets (pseudogene) <sup>a</sup>               | 105,326                                       | 0                                        |
| miRNA Targets (sncRNA) <sup>a</sup>                   | 23,578                                        | 0                                        |
| Histone Modifications <sup>a</sup>                    | 14                                            | 0                                        |
| RNA Modifications Sites <sup>b</sup>                  | 2,545,031 (1,103,583 high accuracy sites)     | 1,397,244                                |
| RNA Modification Clusters <sup>b</sup>                | 6,068                                         | 0                                        |
| Regularory Pairs of mod-mirTar (circRNA) <sup>b</sup> | 258,111                                       | 0                                        |
| Regularory Pairs of mod-mirTar (lincRNA) <sup>b</sup> | 10,657                                        | 0                                        |
| Regularory Pairs of mod-mirTar (mRNA) <sup>b</sup>    | 314,520                                       | 45,423                                   |

|                                                                            |                                                             |                                       |
|----------------------------------------------------------------------------|-------------------------------------------------------------|---------------------------------------|
| Regularory Pairs of mod-mirTar (pseudogene) <sup>b</sup>                   | 7,746                                                       | 0                                     |
| Regularory Pairs of mod-mirTar (sncRNA) <sup>b</sup>                       | 1,684                                                       | 0                                     |
| Regularory Pairs of mod-RBP binding sites <sup>b</sup>                     | 7,178,019                                                   | 3,261,544                             |
| Regularory Pairs of mod-SNVs <sup>b</sup>                                  | 971,808                                                     | 192,283                               |
| Regularory Pairs of mod-SNPs <sup>b</sup>                                  | 3,904                                                       | 1,862                                 |
| Co-localization of RNA modifications and histone modification <sup>b</sup> | 13 cells, 6 RNA modifications *<br>32 histone modifications | 0                                     |
| Expression profiles of RMPs in cancers <sup>b</sup>                        | Yes                                                         | No                                    |
| somatic mutation-driver RMPs <sup>b</sup>                                  | 16                                                          | 0                                     |
| SCNA-driver RMPs <sup>b</sup>                                              | 38                                                          | 0                                     |
| Mechanism (snoRNA-guided Ψ and 2'-O-Me) <sup>b</sup>                       | Yes                                                         | No                                    |
| Motif <sup>b</sup>                                                         | 11 RNA modifications                                        | m <sup>6</sup> A and m <sup>1</sup> A |
| RNA secondary structures <sup>b</sup>                                      | Yes                                                         | No                                    |
| Web-based Tools <sup>c</sup>                                               | 3                                                           | 2                                     |
| Cell/Tissues Information <sup>c</sup>                                      | Yes                                                         | No                                    |
| Evolutionary Conservation <sup>c</sup>                                     | Yes                                                         | No                                    |

## References

1. Li, J.H., Liu, S., Zhou, H., Qu, L.H. and Yang, J.H. (2014) starBase v2.0: decoding miRNA-ceRNA, miRNA-ncRNA and protein-RNA interaction networks from large-scale CLIP-Seq data. *Nucleic Acids Res*, **42**, D92-97.
2. Zhu, Y., Xu, G., Yang, Y.T., Xu, Z., Chen, X., Shi, B., Xie, D., Lu, Z.J. and Wang, P. (2019) POSTAR2: deciphering the post-transcriptional regulatory logics. *Nucleic Acids Res*, **47**, D203-D211.
3. Tate, J.G., Bamford, S., Jubb, H.C., Sondka, Z., Beare, D.M., Bindal, N., Boutselakis, H., Cole, C.G., Creatore, C., Dawson, E. *et al.* (2019) COSMIC: the Catalogue Of Somatic Mutations In Cancer. *Nucleic Acids Res*, **47**, D941-D947.
4. Alexandrov, L.B., Nik-Zainal, S., Wedge, D.C., Aparicio, S.A., Behjati, S., Biankin, A.V., Bignell, G.R., Bolli, N., Borg, A., Borresen-Dale, A.L. *et al.* (2013) Signatures of mutational processes in human cancer. *Nature*, **500**, 415-421.
5. Lawrence, M.S., Stojanov, P., Mermel, C.H., Robinson, J.T., Garraway, L.A., Golub, T.R., Meyerson, M., Gabriel, S.B., Lander, E.S. and Getz, G. (2014) Discovery and saturation analysis of cancer genes across 21 tumour types. *Nature*, **505**, 495-501.
6. Landrum, M.J., Chitipiralla, S., Brown, G.R., Chen, C., Gu, B., Hart, J., Hoffman, D., Jang, W., Kaur, K., Liu, C. *et al.* (2020) ClinVar: improvements to accessing data. *Nucleic Acids Res*, **48**, D835-D844.
7. Buniello, A., MacArthur, J.A.L., Cerezo, M., Harris, L.W., Hayhurst, J., Malangone, C., McMahon, A., Morales, J., Mountjoy, E., Sollis, E. *et al.* (2019) The NHGRI-EBI GWAS Catalog of published genome-wide association studies, targeted arrays and summary statistics 2019. *Nucleic Acids Res*, **47**, D1005-D1012.
8. Carithers, L.J. and Moore, H.M. (2015) The Genotype-Tissue Expression (GTEx) Project. *Biopreserv Biobank*, **13**, 307-308.
